# Supplementary material
Source: HighWire-hosted journal article supplement (https://erj.ersjournals.com/content/57/2/2004279)
Supplement: inline-supplementary-material-1 [file inline-supplementary-material-1.pdf]

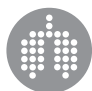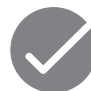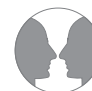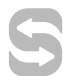

SHAREABLE PDF

# Pulmonary embolism in COVID-19: D-dimer threshold selection should not be based on maximising Youden's index

Daniël A. Korevaar and Josien van Es

**Affiliation:** Dept of Respiratory Medicine, Amsterdam University Medical Centres, University of Amsterdam, Amsterdam, The Netherlands.

**Correspondence:** Daniël A. Korevaar, Dept of Respiratory Medicine, Amsterdam University Medical Centres, University of Amsterdam, Meibergdreef 9, 1105 AZ Amsterdam, The Netherlands. E-mail: d.a.korevaar@amsterdamumc.nl

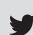

@ERSpublications

**D-dimer thresholds for ruling-out pulmonary embolism should not be selected based on the “optimal” Youden's index** <https://bit.ly/2Mfp4on>

**Cite this article as:** Korevaar DA, van Es J. Pulmonary embolism in COVID-19: D-dimer threshold selection should not be based on maximising Youden's index. *Eur Respir J* 2021; 57: 2004279 [<https://doi.org/10.1183/13993003.04279-2020>].

This single-page version can be shared freely online.

## To the Editor:

The severe acute respiratory syndrome coronavirus 2 (SARS-CoV-2) pandemic has raised new challenges in the diagnosis of pulmonary embolism (PE) [1]. Patients with coronavirus disease 2019 (COVID-19) are at increased risk of developing venous thromboembolism, but symptoms of COVID-19 and PE may overlap, which makes it difficult to identify those with a higher likelihood of PE. Simple and minimally invasive diagnostic algorithms that can safely rule-out PE in patients with COVID-19 are urgently needed. Therefore, we read with interest the recent paper by MOUHAT *et al.* [2] in the *European Respiratory Journal*.
